# Supplementary material for: Adding pieces to the puzzle: insights into diversity and distribution patterns of Cumacea (Crustacea: Peracarida) from the deep North Atlantic to the Arctic Ocean
Source: PeerJ journal article supplement (doi:10.7717/peerj.12379), 2021-11-11

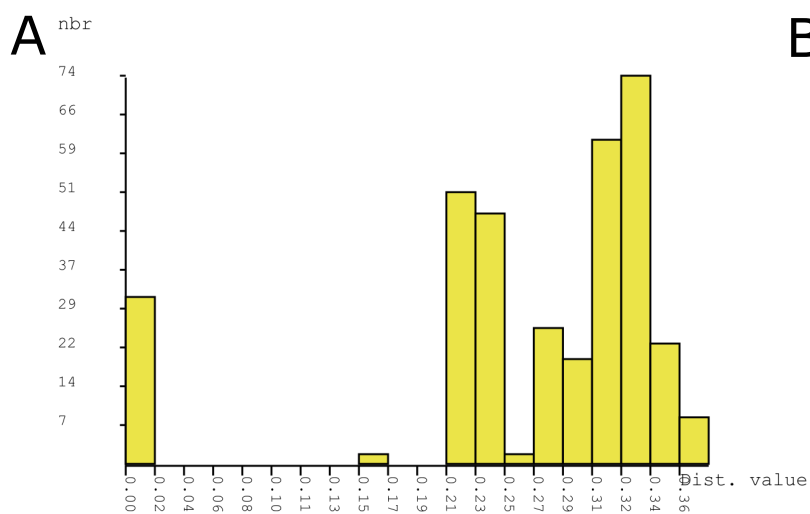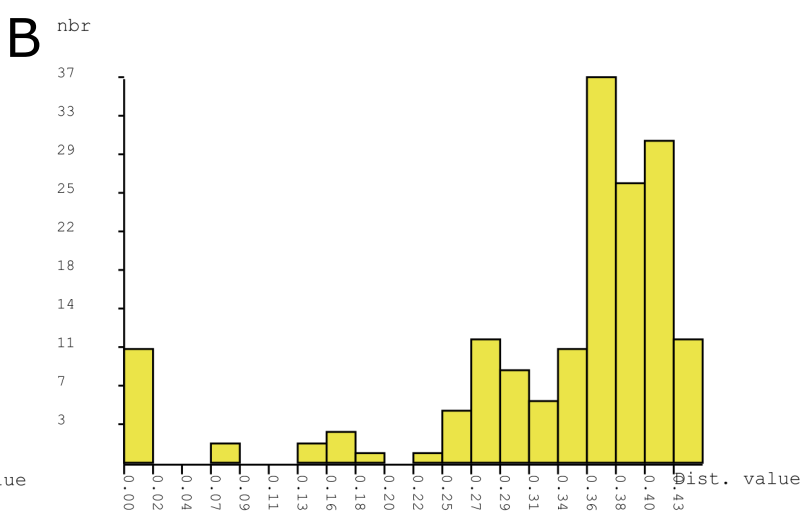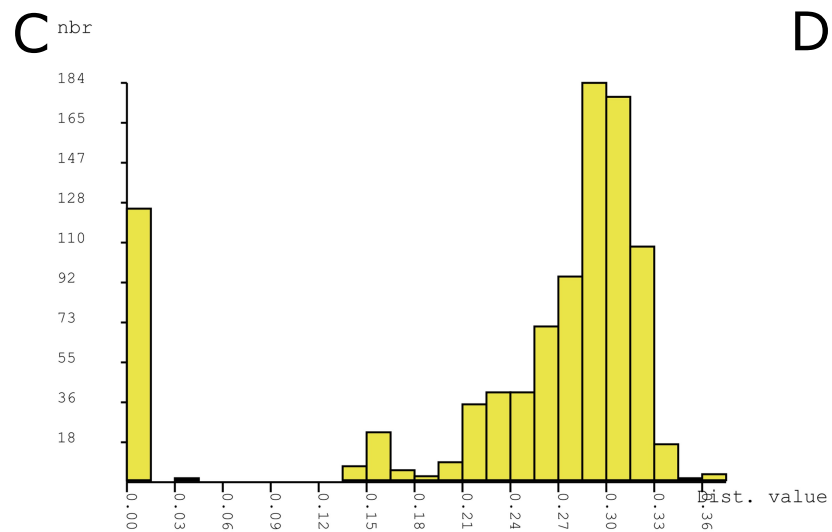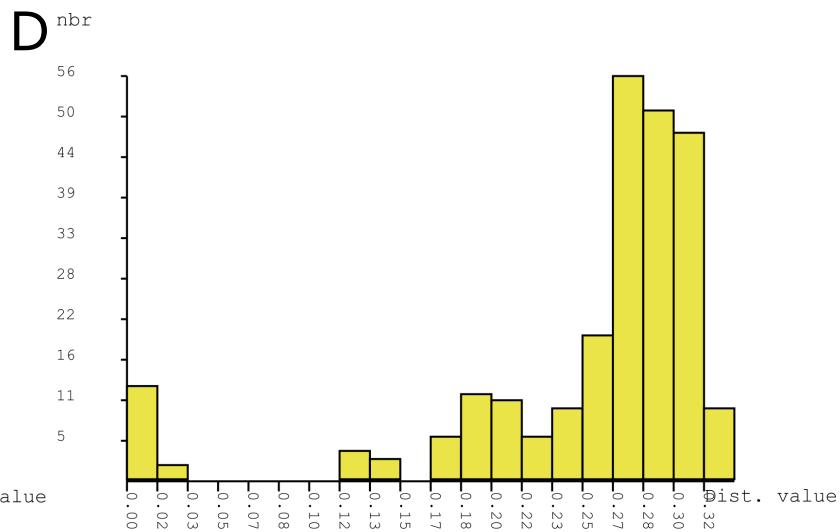

Supplement: Supplemental_Figure_S1.pdf [file Supplemental_Figure_S1.pdf]
