# Supplementary material for: Adding pieces to the puzzle: insights into diversity and distribution patterns of Cumacea (Crustacea: Peracarida) from the deep North Atlantic to the Arctic Ocean
Source: PeerJ journal article supplement (doi:10.7717/peerj.12379), 2021-11-11
Supplement: Supplemental_Table_S2.pdf [file Supplemental_Table_S2.pdf]

| Classification | Putative species                                                              | Species ID    |
|----------------|-------------------------------------------------------------------------------|---------------|
| Family         | <b>BODOTRIIDAE</b> T. Scott, 1901                                             |               |
|                | Bodotriidae sp. 1                                                             | Bod03         |
|                | Bodotriidae sp. 2                                                             | Bod04         |
| Subfamily      | <b>Bodotriinae</b>                                                            |               |
|                | <i>Atlantocuma</i> sp.                                                        | -             |
|                | <i>Cyclaspis longicaudata</i> Sars, 1865                                      | Bod05-A/-B    |
|                | <i>Cyclaspis</i> sp.                                                          | -             |
|                | <i>Iphinoe serrata</i> Norman, 1867                                           | Bod06         |
| Subfamily      | <b>Vaunthompsoninae</b>                                                       |               |
|                | <i>Bathycuma</i> cf. <i>brevirostre</i> Norman, 1879                          | Bod01         |
|                | <i>Bathycuma</i> sp. 1                                                        | Bod02         |
|                | <i>Cumopsis fagei</i> Băcescu, 1956                                           | -             |
| Family         | <b>CERATOCUMATIDAE</b> Calman, 1905                                           |               |
|                | <i>Cimmerius reticulatus</i> Jones, 1973                                      | Cer01         |
| Family         | <b>DIASTYLIDAE</b> Bate, 1856                                                 |               |
|                | <i>Diastylis cornuta</i> Boeck, 1864                                          | Dia01         |
|                | <i>Diastylis echinata</i> Bate, 1865                                          | Dia02         |
|                | <i>Diastylis goodsiri</i> Bell, 1855                                          | Dia03         |
|                | <i>Diastylis laevis</i> Norman, 1869                                          | Dia04         |
|                | <i>Diastylis lucifera</i> Krøyer, 1837                                        | Dia05         |
|                | <i>Diastylis polaris</i> Sars, 1871                                           | Dia06         |
|                | <i>Diastylis rathkei</i> Krøyer, 1841                                         | Dia07         |
|                | <i>Diastylis sculptata</i> G.O. Sars, 1871                                    | -             |
|                | <i>Diastylis spinulosa</i> Heller, 1875                                       | Dia08         |
|                | <i>Diastylis tumida</i> Liljeborg, 1855                                       | Dia09         |
|                | <i>Diastylodes atlanticus</i> Reys, 1974                                      | Dia10         |
|                | <i>Diastylodes biplicatus</i> G.O. Sars, 1865                                 | Dia11         |
|                | <i>Diastylodes serratus</i> G.O. Sars, 1865                                   | Dia12         |
|                | <i>Diastylodes</i> sp. 1                                                      | Dia13         |
|                | <i>Diastylopsis</i> sp.                                                       | -             |
|                | <i>Leptostylis ampullacea</i> Liljeborg, 1855                                 | Dia14         |
|                | <i>Leptostylis borealis</i> Stappers, 1908                                    | Dia15         |
|                | <i>Leptostylis longimana</i> Sars, 1865                                       | Dia16-A/-B    |
|                | <i>Leptostylis</i> sp. 1                                                      | Dia17         |
|                | <i>Leptostylis</i> sp. 2                                                      | Dia18         |
|                | <i>Makrokyllindrus (Makrokyllindrus)</i> cf. <i>spiniventris</i> Hansen, 1920 | Dia19         |
| Family         | <b>LAMPROPIIDAE</b> Sars, 1878                                                |               |
|                | <i>Alamprops augustinensis</i> Gerken, 2005                                   | Lam01         |
|                | <i>Chalarostylis elegans</i> Norman, 1879                                     | Lam02         |
|                | <i>Chalarostylis</i> sp. 1                                                    | Lam03         |
|                | <i>Hemilamprops assimilis</i> Sars, 1883                                      | Lam04         |
|                | <i>Hemilamprops cristatus</i> G.O. Sars, 1870                                 | Lam05-A/-B    |
|                | <i>Hemilamprops</i> cf. <i>diversus</i> Hale, 1946                            | Lam06         |
|                | <i>Hemilamprops pterini</i> Shalla and Bishop, 2007                           | Lam07         |
|                | <i>Hemilamprops roseus</i> Sars, 1883                                         | Lam08         |
|                | <i>Hemilamprops</i> sp. 1 (juv.)                                              | Lam09         |
|                | <i>Hemilamprops</i> sp. 2                                                     | Lam10         |
|                | <i>Hemilamprops uniplicatus</i> G.O. Sars, 1872                               | Lam11         |
|                | <i>Mesolamprops denticulatus</i> Norman, 1863                                 | Lam12         |
|                | <i>Platysympus typicus</i> Sars, 1870                                         | Lam13         |
|                | <i>Platyphlops semiornatus</i> Fage, 1929                                     | Lam14         |
| Family         | <b>LEUCONIDAE</b> Sars, 1878                                                  |               |
|                | <i>Eudorella emarginata</i> Krøyer, 1846                                      | Leu01         |
|                | <i>Eudorella hirsuta</i> Sars, 1869                                           | Leu02         |
|                | <i>Eudorella pusilla</i> Sars, 1871                                           | -             |
|                | <i>Eudorella</i> sp. 1                                                        | Leu03         |
|                | <i>Eudorella truncatula</i> Bate, 1856                                        | Leu04-A/-B/-C |
|                | <i>Leucon (Alytleucon) pallidus</i> G.O. Sars, 1865                           | Leu05         |
|                | <i>Leucon (Crymoleucon) antarcticus</i> Zimmer, 1907                          | -             |
|                | <i>Leucon (Crymoleucon) intermedius</i> Mühlenhardt-Siegel, 1996              | -             |
|                | <i>Leucon (Crymoleucon) rossi</i> Rehm & Heard, 2008                          | -             |
|                | <i>Leucon (Crymoleucon) tener</i> Hansen, 1920                                | Leu06         |
|                | <i>Leucon (Leucon) acutirostris</i> G.O. Sars, 1865                           | Leu07         |
|                | <i>Leucon (Leucon) assimilis</i> Sars, 1886                                   | -             |
|                | <i>Leucon (Leucon) nathorsti</i> Ohlin, 1901                                  | Leu08         |
|                | <i>Leucon (Leucon) aff. nathorsti</i> Ohlin, 1901                             | Leu09         |
|                | <i>Leucon (Leucon) nasicoideus</i> Krøyer, 1841                               | Leu10         |
|                | <i>Leucon (Leucon) profundus</i> Hansen, 1920                                 | Leu11         |
|                | <i>Leucon (Leucon) cf. robustus</i> Hansen, 1920                              | Leu12         |
|                | <i>Leucon (Macrauloeucon) siphonatus</i> Calman, 1905                         | Leu13         |
|                | <i>Leucon (Macrauloeucon) spinulosus</i> Hansen, 1920                         | Leu14         |
|                | <i>Leucon</i> sp.                                                             | -             |
|                | <i>Leucon</i> sp. 1                                                           | Leu15         |
| Family         | <b>NANNASTACIIDAE</b> Bate, 1866                                              |               |
|                | <i>Campylaspides</i> sp. 1                                                    | Nan01         |
|                | <i>Campylaspis alba</i> Hansen, 1920                                          | Nan02         |
|                | <i>Campylaspis costata</i> Sars, 1865                                         | Nan03         |
|                | <i>Campylaspis globosa</i> Hansen, 1920                                       | Nan04         |
|                | <i>Campylaspis horrida</i> Sars, 1870                                         | Nan05         |
|                | <i>Campylaspis intermedia</i> Hansen, 1920                                    | Nan06         |
|                | <i>Campylaspis rubicunda</i> Liljeborg, 1855                                  | Nan07         |
|                | <i>Campylaspis</i> sp. 1                                                      | Nan08         |
|                | <i>Campylaspis</i> sp. 2                                                      | Nan09         |
|                | <i>Campylaspis sulcata</i> Sars, 1870                                         | Nan10         |
|                | <i>Campylaspis undata</i> Sars, 1864                                          | Nan11         |
|                | <i>Cumella (Cumella) decipiens</i> Jones, 1984                                | Nan12         |
|                | <i>Cumellopsis</i> cf. <i>puritani</i> Calman, 1906                           | Nan13         |
|                | Nannastaciidae sp. 1                                                          | Nan14         |
|                | <i>Procampylaspis ommidion</i> Jones, 1984                                    | Nan15         |
|                | <i>Procampylaspis</i> sp. 1                                                   | Nan16         |
|                | <i>Styloptocuma erectum</i> Jones, 1984                                       | Nan17         |
|                | <i>Styloptocuma gracillimum</i> Calman, 1905                                  | Nan18         |
|                | <i>Styloptocuma</i> sp. 1                                                     | Nan19         |
|                | <i>Styloptocuma</i> sp. 2                                                     | Nan20         |
| Family         | <b>PSEUDOCUMATIDAE</b> Sars, 1878                                             |               |
|                | <i>Petalosarsia declivis</i> Sars, 1865                                       | Pse01         |
|                | <i>Pseudocuma</i> sp. 1                                                       | Pse02         |
