# Supplementary material for: Adding pieces to the puzzle: insights into diversity and distribution patterns of Cumacea (Crustacea: Peracarida) from the deep North Atlantic to the Arctic Ocean
Source: PeerJ journal article supplement (doi:10.7717/peerj.12379), 2021-11-11
Supplement: Supplemental_Table_S10.pdf [file Supplemental_Table_S10.pdf]

**Bodotriidae and  
Nannastacidae**

HQ450558 *Atlantocuma* sp.  
 seq6 *Campylaspis costata*  
 seq9 *Campylaspis globosa*  
 seq10 *Campylaspis horrida*  
 seq14 *Campylaspis sulcata*  
 seq21 *Campylaspis undata*  
 AJ388111 *Cumopsis fagei*  
 seq2 *Cyclaspis longicaudata*  
 HQ450557 *Cyclaspis* sp.  
 ICE1-Bod001 *Cyclaspis longicaudata*  
 ICE1-Bod002 *Cyclaspis longicaudata*  
 ICE1-Bod003 Bodotriidae sp. 1  
 ICE1-Bod004 *Bathycuma brevirostre*  
 seq4 *Iphinoe serrata*  
 P-Nann001 *Campylaspis rubicunda*  
 P-Nann002 *Campylaspis rubicunda*  
 P-Nann003 *Campylaspis rubicunda*  
 P-Nann004 *Campylaspis rubicunda*  
 P-Nann011 *Campylaspis rubicunda*

|           | 1    | 2    | 3    | 4    | 5    | 6    | 7    | 8    | 9    | 10   | 11   | 12   | 13   | 14   | 15   | 16   | 17   | 18   | 19   |
|-----------|------|------|------|------|------|------|------|------|------|------|------|------|------|------|------|------|------|------|------|
| <b>1</b>  |      | 0.41 | 0.38 | 0.41 | 0.40 | 0.38 | 0.36 | 0.32 | 0.31 | 0.31 | 0.31 | 0.34 | 0.33 | 0.37 | 0.38 | 0.38 | 0.39 | 0.38 | 0.38 |
| <b>2</b>  | 0.41 |      | 0.30 | 0.17 | 0.36 | 0.19 | 0.44 | 0.37 | 0.37 | 0.38 | 0.38 | 0.40 | 0.41 | 0.38 | 0.37 | 0.37 | 0.40 | 0.37 | 0.37 |
| <b>3</b>  | 0.38 | 0.30 |      | 0.28 | 0.28 | 0.30 | 0.43 | 0.36 | 0.37 | 0.38 | 0.37 | 0.38 | 0.36 | 0.39 | 0.31 | 0.31 | 0.33 | 0.30 | 0.31 |
| <b>4</b>  | 0.41 | 0.17 | 0.28 |      | 0.34 | 0.17 | 0.43 | 0.38 | 0.37 | 0.37 | 0.37 | 0.39 | 0.38 | 0.39 | 0.36 | 0.36 | 0.38 | 0.36 | 0.36 |
| <b>5</b>  | 0.40 | 0.36 | 0.28 | 0.34 |      | 0.34 | 0.42 | 0.40 | 0.41 | 0.39 | 0.39 | 0.41 | 0.35 | 0.41 | 0.25 | 0.25 | 0.26 | 0.25 | 0.25 |
| <b>6</b>  | 0.38 | 0.19 | 0.30 | 0.17 | 0.34 |      | 0.43 | 0.40 | 0.39 | 0.38 | 0.38 | 0.37 | 0.38 | 0.39 | 0.37 | 0.37 | 0.40 | 0.37 | 0.37 |
| <b>7</b>  | 0.36 | 0.44 | 0.43 | 0.43 | 0.42 | 0.43 |      | 0.36 | 0.34 | 0.35 | 0.35 | 0.37 | 0.35 | 0.34 | 0.44 | 0.44 | 0.45 | 0.44 | 0.44 |
| <b>8</b>  | 0.32 | 0.37 | 0.36 | 0.38 | 0.40 | 0.40 | 0.36 |      | 0.17 | 0.08 | 0.08 | 0.29 | 0.29 | 0.28 | 0.42 | 0.42 | 0.44 | 0.42 | 0.42 |
| <b>9</b>  | 0.31 | 0.37 | 0.37 | 0.37 | 0.41 | 0.39 | 0.34 | 0.17 |      | 0.15 | 0.14 | 0.28 | 0.29 | 0.33 | 0.42 | 0.42 | 0.44 | 0.42 | 0.42 |
| <b>10</b> | 0.31 | 0.38 | 0.38 | 0.37 | 0.39 | 0.38 | 0.35 | 0.08 | 0.15 |      | 0.00 | 0.28 | 0.28 | 0.28 | 0.41 | 0.41 | 0.45 | 0.41 | 0.41 |
| <b>11</b> | 0.31 | 0.38 | 0.37 | 0.37 | 0.39 | 0.38 | 0.35 | 0.08 | 0.14 | 0.00 |      | 0.27 | 0.27 | 0.28 | 0.41 | 0.40 | 0.44 | 0.40 | 0.40 |
| <b>12</b> | 0.34 | 0.40 | 0.38 | 0.39 | 0.41 | 0.37 | 0.37 | 0.29 | 0.28 | 0.28 | 0.27 |      | 0.24 | 0.32 | 0.41 | 0.41 | 0.42 | 0.41 | 0.41 |
| <b>13</b> | 0.33 | 0.41 | 0.36 | 0.38 | 0.35 | 0.38 | 0.35 | 0.29 | 0.29 | 0.28 | 0.27 | 0.24 |      | 0.34 | 0.37 | 0.37 | 0.40 | 0.37 | 0.37 |
| <b>14</b> | 0.37 | 0.38 | 0.39 | 0.39 | 0.41 | 0.39 | 0.34 | 0.28 | 0.33 | 0.28 | 0.28 | 0.32 | 0.34 |      | 0.41 | 0.41 | 0.42 | 0.41 | 0.41 |
| <b>15</b> | 0.38 | 0.37 | 0.31 | 0.36 | 0.25 | 0.37 | 0.44 | 0.42 | 0.42 | 0.41 | 0.41 | 0.41 | 0.37 | 0.41 |      | 0.00 | 0.00 | 0.01 | 0.00 |
| <b>16</b> | 0.38 | 0.37 | 0.31 | 0.36 | 0.25 | 0.37 | 0.44 | 0.42 | 0.42 | 0.41 | 0.40 | 0.41 | 0.37 | 0.41 | 0.00 |      | 0.00 | 0.01 | 0.00 |
| <b>17</b> | 0.39 | 0.40 | 0.33 | 0.38 | 0.26 | 0.40 | 0.45 | 0.44 | 0.44 | 0.45 | 0.44 | 0.42 | 0.40 | 0.42 | 0.00 | 0.00 |      | 0.01 | 0.00 |
| <b>18</b> | 0.38 | 0.37 | 0.30 | 0.36 | 0.25 | 0.37 | 0.44 | 0.42 | 0.42 | 0.41 | 0.40 | 0.41 | 0.37 | 0.41 | 0.01 | 0.01 | 0.01 |      | 0.01 |
| <b>19</b> | 0.38 | 0.37 | 0.31 | 0.36 | 0.25 | 0.37 | 0.44 | 0.42 | 0.42 | 0.41 | 0.40 | 0.41 | 0.37 | 0.41 | 0.00 | 0.00 | 0.00 | 0.01 |      |
