# Supplementary material for: Adding pieces to the puzzle: insights into diversity and distribution patterns of Cumacea (Crustacea: Peracarida) from the deep North Atlantic to the Arctic Ocean
Source: PeerJ journal article supplement (doi:10.7717/peerj.12379), 2021-11-11
Supplement: Supplemental_Table_S11.pdf [file Supplemental_Table_S11.pdf]

| ABGD Group<br>(P = 0.01-0.1) | Putative species                                         | N | Intra-specific |      | Inter-specific |      | Nearest neighbor<br>(min $p$ -distance) |
|------------------------------|----------------------------------------------------------|---|----------------|------|----------------|------|-----------------------------------------|
|                              |                                                          |   | min            | max  | min            | max  |                                         |
| Leu02                        | <i>Eudorella hirsuta</i>                                 | 2 | 0.00           | 0.00 | 0.24           | 0.35 | Leu10                                   |
| Leu04-A                      | <i>Eudorella truncatula</i> (seq 64/ 67)                 | 2 | 0.00           | 0.00 | 0.21           | 0.38 | Leu04-C                                 |
| Leu04-B                      | <i>Eudorella truncatula</i> (seq 65/ 68)                 | 2 | 0.01           | 0.01 | 0.17           | 0.37 | Leu04-C                                 |
| Leu04-C                      | <i>Eudorella truncatula</i> (seq 69)                     | 1 | 0.00           | 0.00 | 0.17           | 0.36 | Leu04-B                                 |
| Leu11                        | <i>Leucon (Leucon) profundus</i>                         | 3 | 0.00           | 0.00 | 0.22           | 0.36 | Leu10                                   |
| Leu05                        | <i>Leucon (Alytoleucon) pallidus</i>                     | 7 | 0.00           | 0.00 | 0.21           | 0.34 | Leu08                                   |
| Leu14                        | <i>Leucon (Macrauloleucon) spinulosus</i>                | 1 | 0.00           | 0.00 | 0.32           | 0.38 | Leu10, Leu05                            |
|                              | <i>Leucon (Leucon) assimilis</i>                         | 2 | 0.00           | 0.00 | 0.22           | 0.35 | Leu10                                   |
|                              | <i>Leucon (Crymoleucon) intermedius</i>                  | 2 | 0.01           | 0.01 | 0.29           | 0.38 | Leu02                                   |
| Leu08                        | <i>Leucon (Leucon) nathorsti/ L. (L.) aff. nathorsti</i> | 3 | 0.00           | 0.01 | 0.21           | 0.35 | Leu05                                   |
| Leu10                        | <i>Leucon (Leucon) nasicooides</i>                       | 1 | 0.00           | 0.00 | 0.22           | 0.33 | Leu10, Le08                             |
|                              | <i>Leucon</i> sp.                                        | 1 | 0.00           | 0.00 | 0.28           | 0.38 | Leu10                                   |

N = Number of sequences
