# Supplementary material for: Adding pieces to the puzzle: insights into diversity and distribution patterns of Cumacea (Crustacea: Peracarida) from the deep North Atlantic to the Arctic Ocean
Source: PeerJ journal article supplement (doi:10.7717/peerj.12379), 2021-11-11
Supplement: Supplemental_Table_S12.pdf [file Supplemental_Table_S12.pdf]

# Leuconidae

|                                      | 1  | 2    | 3    | 4    | 5    | 6    | 7    | 8    | 9    | 10   | 11   | 12   | 13   | 14   | 15   | 16   | 17   | 18   | 19   | 20   | 21   | 22   | 23   | 24   | 25   | 26   | 27   |
|--------------------------------------|----|------|------|------|------|------|------|------|------|------|------|------|------|------|------|------|------|------|------|------|------|------|------|------|------|------|------|
| seq62 <i>Eudorella hirsuta</i>       | 1  | 0.00 | 0.31 | 0.32 | 0.31 | 0.31 | 0.29 | 0.28 | 0.27 | 0.28 | 0.28 | 0.28 | 0.28 | 0.27 | 0.27 | 0.35 | 0.27 | 0.26 | 0.26 | 0.30 | 0.29 | 0.28 | 0.28 | 0.24 | 0.29 | 0.27 | 0.31 |
| seq63 <i>Eudorella hirsuta</i>       | 2  | 0.00 | 0.31 | 0.32 | 0.31 | 0.32 | 0.30 | 0.28 | 0.28 | 0.28 | 0.28 | 0.28 | 0.28 | 0.28 | 0.28 | 0.35 | 0.28 | 0.27 | 0.27 | 0.30 | 0.30 | 0.29 | 0.29 | 0.24 | 0.29 | 0.28 | 0.31 |
| seq64 <i>Eudorella truncatula</i>    | 3  | 0.31 | 0.31 | 0.23 | 0.00 | 0.23 | 0.21 | 0.33 | 0.31 | 0.31 | 0.33 | 0.31 | 0.34 | 0.31 | 0.31 | 0.37 | 0.31 | 0.34 | 0.34 | 0.33 | 0.33 | 0.33 | 0.33 | 0.33 | 0.33 | 0.31 | 0.38 |
| seq65 <i>Eudorella truncatula</i>    | 4  | 0.32 | 0.32 | 0.23 | 0.23 | 0.01 | 0.17 | 0.36 | 0.33 | 0.33 | 0.36 | 0.33 | 0.36 | 0.33 | 0.33 | 0.37 | 0.33 | 0.35 | 0.35 | 0.34 | 0.34 | 0.35 | 0.35 | 0.33 | 0.35 | 0.33 | 0.37 |
| seq67 <i>Eudorella truncatula</i>    | 5  | 0.31 | 0.31 | 0.00 | 0.23 | 0.23 | 0.21 | 0.33 | 0.30 | 0.30 | 0.33 | 0.30 | 0.33 | 0.30 | 0.31 | 0.36 | 0.30 | 0.33 | 0.33 | 0.33 | 0.33 | 0.32 | 0.32 | 0.32 | 0.32 | 0.30 | 0.37 |
| seq68 <i>Eudorella truncatula</i>    | 6  | 0.31 | 0.32 | 0.23 | 0.01 | 0.23 | 0.17 | 0.36 | 0.33 | 0.33 | 0.36 | 0.33 | 0.36 | 0.33 | 0.33 | 0.37 | 0.33 | 0.35 | 0.35 | 0.34 | 0.35 | 0.35 | 0.35 | 0.33 | 0.35 | 0.33 | 0.37 |
| seq69 <i>Eudorella truncatula</i>    | 7  | 0.29 | 0.30 | 0.21 | 0.17 | 0.21 | 0.17 | 0.34 | 0.32 | 0.32 | 0.34 | 0.32 | 0.34 | 0.32 | 0.32 | 0.36 | 0.32 | 0.34 | 0.34 | 0.31 | 0.31 | 0.34 | 0.34 | 0.33 | 0.34 | 0.32 | 0.34 |
| ICE1-Leu001 <i>Leucon profundus</i>  | 8  | 0.28 | 0.28 | 0.33 | 0.36 | 0.33 | 0.36 | 0.34 | 0.24 | 0.24 | 0.00 | 0.24 | 0.00 | 0.24 | 0.24 | 0.33 | 0.24 | 0.24 | 0.24 | 0.32 | 0.31 | 0.23 | 0.23 | 0.22 | 0.23 | 0.24 | 0.34 |
| ICE1-Leu002 <i>Leucon pallidus</i>   | 9  | 0.27 | 0.28 | 0.31 | 0.33 | 0.30 | 0.33 | 0.32 | 0.24 | 0.00 | 0.24 | 0.00 | 0.25 | 0.00 | 0.00 | 0.34 | 0.00 | 0.23 | 0.23 | 0.31 | 0.31 | 0.22 | 0.21 | 0.23 | 0.22 | 0.00 | 0.34 |
| ICE1-Leu003 <i>Leucon pallidus</i>   | 10 | 0.28 | 0.28 | 0.31 | 0.33 | 0.30 | 0.33 | 0.32 | 0.24 | 0.00 | 0.24 | 0.00 | 0.25 | 0.00 | 0.00 | 0.34 | 0.00 | 0.23 | 0.23 | 0.31 | 0.31 | 0.22 | 0.22 | 0.23 | 0.22 | 0.00 | 0.34 |
| ICE1-Leu004 <i>Leucon profundus</i>  | 11 | 0.28 | 0.28 | 0.33 | 0.36 | 0.33 | 0.36 | 0.34 | 0.00 | 0.24 | 0.24 | 0.24 | 0.00 | 0.24 | 0.24 | 0.33 | 0.24 | 0.24 | 0.24 | 0.32 | 0.31 | 0.23 | 0.23 | 0.22 | 0.23 | 0.24 | 0.34 |
| ICE1-Leu006 <i>Leucon pallidus</i>   | 12 | 0.28 | 0.28 | 0.31 | 0.33 | 0.30 | 0.33 | 0.32 | 0.24 | 0.00 | 0.00 | 0.24 | 0.25 | 0.00 | 0.00 | 0.34 | 0.00 | 0.23 | 0.23 | 0.31 | 0.31 | 0.22 | 0.21 | 0.23 | 0.22 | 0.00 | 0.34 |
| ICE1-Leu007 <i>Leucon profundus</i>  | 13 | 0.28 | 0.28 | 0.34 | 0.36 | 0.33 | 0.36 | 0.34 | 0.00 | 0.25 | 0.25 | 0.00 | 0.25 | 0.25 | 0.25 | 0.33 | 0.25 | 0.25 | 0.25 | 0.33 | 0.32 | 0.24 | 0.24 | 0.23 | 0.24 | 0.24 | 0.33 |
| ICE1-Leu009 <i>Leucon pallidus</i>   | 14 | 0.27 | 0.28 | 0.31 | 0.33 | 0.30 | 0.33 | 0.32 | 0.24 | 0.00 | 0.00 | 0.24 | 0.00 | 0.25 | 0.00 | 0.34 | 0.00 | 0.23 | 0.23 | 0.31 | 0.31 | 0.22 | 0.21 | 0.23 | 0.22 | 0.00 | 0.34 |
| ICE1-Leu010 <i>Leucon pallidus</i>   | 15 | 0.27 | 0.28 | 0.31 | 0.33 | 0.31 | 0.33 | 0.32 | 0.24 | 0.00 | 0.00 | 0.24 | 0.00 | 0.25 | 0.00 | 0.33 | 0.00 | 0.23 | 0.23 | 0.31 | 0.31 | 0.22 | 0.21 | 0.23 | 0.22 | 0.00 | 0.34 |
| ICE1-Leu018 <i>Leucon spinulosus</i> | 16 | 0.35 | 0.35 | 0.37 | 0.37 | 0.36 | 0.37 | 0.36 | 0.33 | 0.34 | 0.34 | 0.33 | 0.34 | 0.33 | 0.34 | 0.33 | 0.34 | 0.32 | 0.32 | 0.38 | 0.37 | 0.33 | 0.34 | 0.33 | 0.33 | 0.34 | 0.34 |
| ICE1-Leu019 <i>Leucon pallidus</i>   | 17 | 0.27 | 0.28 | 0.31 | 0.33 | 0.30 | 0.33 | 0.32 | 0.24 | 0.00 | 0.00 | 0.24 | 0.00 | 0.25 | 0.00 | 0.00 | 0.34 | 0.23 | 0.23 | 0.31 | 0.31 | 0.22 | 0.21 | 0.23 | 0.22 | 0.00 | 0.34 |
| HQ450552 <i>Leucon assimilis</i>     | 18 | 0.26 | 0.27 | 0.34 | 0.35 | 0.33 | 0.35 | 0.34 | 0.24 | 0.23 | 0.23 | 0.24 | 0.23 | 0.25 | 0.23 | 0.23 | 0.32 | 0.23 | 0.00 | 0.31 | 0.30 | 0.23 | 0.23 | 0.22 | 0.23 | 0.23 | 0.31 |
| HQ450553 <i>Leucon assimilis</i>     | 19 | 0.26 | 0.27 | 0.34 | 0.35 | 0.33 | 0.35 | 0.34 | 0.24 | 0.23 | 0.23 | 0.24 | 0.23 | 0.25 | 0.23 | 0.23 | 0.32 | 0.23 | 0.00 | 0.31 | 0.30 | 0.23 | 0.23 | 0.22 | 0.23 | 0.23 | 0.31 |
| HQ450549 <i>Leucon intermedius</i>   | 20 | 0.30 | 0.30 | 0.33 | 0.34 | 0.33 | 0.34 | 0.31 | 0.32 | 0.31 | 0.31 | 0.32 | 0.31 | 0.33 | 0.31 | 0.31 | 0.38 | 0.31 | 0.31 | 0.31 | 0.01 | 0.32 | 0.32 | 0.31 | 0.32 | 0.31 | 0.32 |
| HQ450550 <i>Leucon intermedius</i>   | 21 | 0.29 | 0.30 | 0.33 | 0.34 | 0.33 | 0.35 | 0.31 | 0.31 | 0.31 | 0.31 | 0.31 | 0.31 | 0.32 | 0.31 | 0.31 | 0.37 | 0.31 | 0.30 | 0.30 | 0.01 | 0.31 | 0.31 | 0.31 | 0.31 | 0.31 | 0.30 |
| seq72 <i>Leucon nasica</i>           | 22 | 0.28 | 0.29 | 0.33 | 0.35 | 0.32 | 0.35 | 0.34 | 0.23 | 0.22 | 0.22 | 0.23 | 0.22 | 0.24 | 0.22 | 0.22 | 0.33 | 0.22 | 0.23 | 0.23 | 0.32 | 0.31 | 0.00 | 0.25 | 0.01 | 0.22 | 0.34 |
| seq73 <i>Leucon nasica</i>           | 23 | 0.28 | 0.29 | 0.33 | 0.35 | 0.32 | 0.35 | 0.34 | 0.23 | 0.21 | 0.22 | 0.23 | 0.21 | 0.24 | 0.21 | 0.21 | 0.34 | 0.21 | 0.23 | 0.23 | 0.32 | 0.31 | 0.00 | 0.25 | 0.01 | 0.21 | 0.34 |
| seq74 <i>Leucon nasicoides</i>       | 24 | 0.24 | 0.24 | 0.33 | 0.33 | 0.32 | 0.33 | 0.33 | 0.22 | 0.23 | 0.23 | 0.22 | 0.23 | 0.23 | 0.23 | 0.23 | 0.33 | 0.23 | 0.22 | 0.22 | 0.31 | 0.31 | 0.25 | 0.25 | 0.25 | 0.23 | 0.28 |
| seq75 <i>Leucon nathorsti</i>        | 25 | 0.29 | 0.29 | 0.33 | 0.35 | 0.32 | 0.35 | 0.34 | 0.23 | 0.22 | 0.22 | 0.23 | 0.22 | 0.24 | 0.22 | 0.22 | 0.33 | 0.22 | 0.23 | 0.23 | 0.32 | 0.31 | 0.01 | 0.01 | 0.25 | 0.22 | 0.34 |
| seq77 <i>Leucon pallidus</i>         | 26 | 0.27 | 0.28 | 0.31 | 0.33 | 0.30 | 0.33 | 0.32 | 0.24 | 0.00 | 0.00 | 0.24 | 0.00 | 0.24 | 0.00 | 0.34 | 0.00 | 0.23 | 0.23 | 0.31 | 0.31 | 0.22 | 0.21 | 0.23 | 0.22 | 0.33 |      |
| HQ450554 <i>Leucon sp.</i>           | 27 | 0.31 | 0.31 | 0.38 | 0.37 | 0.37 | 0.37 | 0.34 | 0.34 | 0.34 | 0.34 | 0.34 | 0.34 | 0.33 | 0.34 | 0.34 | 0.34 | 0.34 | 0.31 | 0.31 | 0.32 | 0.30 | 0.34 | 0.34 | 0.28 | 0.34 | 0.33 |
